# Supplementary material for: The Relationship between Starting to Drink and Psychological Distress, Sleep Disturbance after the Great East Japan Earthquake and Nuclear Disaster: The Fukushima Health Management Survey
Source: MDPI journal article supplement (doi:10.3390/ijerph14101281), 2017-10-24
Supplement: s1 [file s1]

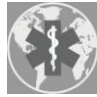

# Supplementary Materials: The Relationship between Starting to Drink and Psychological Distress, Sleep Disturbance after the Great East Japan Earthquake and Nuclear Disaster: The Fukushima Health Management Survey

Masatsugu Orui <sup>1,\*</sup>, Yuka Ueda <sup>2</sup>, Yuriko Suzuki <sup>1,3</sup>, Masaharu Maeda <sup>4,6</sup>, Tetsuya Ohira <sup>2,6</sup>, Hirooki Yabe <sup>5,6</sup> and Seiji Yasumura <sup>1,6</sup>

**Table S1.** Multivariate logistic regression analysis of newly-started drinkers and continuing drinkers after having begun excepted 20–39 age category.

|                                                         | Sample 1<br>Newly-Started Drinkers vs.<br>Continuing Non-Drinkers |                |                     | Sample 2<br>Continuing Newly-Started Drinkers vs.<br>Abstainers |             |             |      |
|---------------------------------------------------------|-------------------------------------------------------------------|----------------|---------------------|-----------------------------------------------------------------|-------------|-------------|------|
|                                                         | Odds Ratio (95% CI)                                               | <i>p</i> Value | Odds Ratio (95% CI) | <i>p</i> Value                                                  |             |             |      |
| <b>Gender</b>                                           |                                                                   |                |                     |                                                                 |             |             |      |
| Male                                                    | 2.14                                                              | (1.92–2.39)    | <0.01               | 1.18                                                            | (0.89–1.55) | 0.25        |      |
| Female (Ref.)                                           | 1.00                                                              |                |                     | 1.00                                                            |             |             |      |
| <b>Age (as of 11 March 2011)</b>                        |                                                                   |                |                     |                                                                 |             |             |      |
| 40–64 years old                                         | 1.60                                                              | (1.42–1.80)    | <0.01               | 1.39                                                            | (1.05–1.85) | 0.02        |      |
| 65 years old and older (Ref.)                           | 1.00                                                              |                |                     | 1.00                                                            |             |             |      |
| <b>Education</b>                                        |                                                                   |                |                     |                                                                 |             |             |      |
| Junior/ Senior high school                              | 0.96                                                              | (0.93–0.99)    | 0.02                | 0.98                                                            | (0.91–1.06) | 0.57        |      |
| Vocational college, University, Graduated school (Ref.) | 1.00                                                              |                |                     | 1.00                                                            |             |             |      |
| <b>Subjective health condition</b>                      |                                                                   |                |                     |                                                                 |             |             |      |
| Not good                                                | 0.96                                                              | (0.93–0.99)    | 0.04                | 0.95                                                            | (0.87–1.04) | 0.25        |      |
| Good/ Unremarkable (Ref.)                               | 1.00                                                              |                |                     | 1.00                                                            |             |             |      |
| <b>Sleep disturbance</b>                                |                                                                   |                |                     |                                                                 |             |             |      |
| Unsatisfied with sleep condition                        | Yes                                                               | 1.06           | (1.03–1.10)         | <0.01                                                           | 1.03        | (0.96–1.11) | 0.44 |
|                                                         | No                                                                | 1.00           |                     |                                                                 | 1.00        |             |      |
| <b>Psychological distress</b>                           |                                                                   |                |                     |                                                                 |             |             |      |
| K6 (13 points and more)                                 | 13≤                                                               | 1.10           | (1.06–1.14)         | <0.01                                                           | 1.06        | (0.95–1.19) | 0.27 |
|                                                         | ≤12                                                               | 1.00           |                     |                                                                 | 1.00        |             |      |
| <b>Disaster-related experience</b>                      |                                                                   |                |                     |                                                                 |             |             |      |
| Experience of tsunami                                   | Yes                                                               | 1.02           | (0.99–1.06)         | 0.21                                                            | 1.04        | (0.96–1.13) | 0.32 |
|                                                         | No                                                                | 1.00           |                     |                                                                 | 1.00        |             |      |

|                                            |      |      |             |       |      |             |       |
|--------------------------------------------|------|------|-------------|-------|------|-------------|-------|
| Experience of nuclear power plant accident | Yes  | 1.02 | (0.99–1.05) | 0.17  | 1.05 | (0.95–1.16) | 0.37  |
|                                            | No   | 1.00 |             |       | 1.00 |             |       |
| <b>Disaster effects on economic status</b> |      |      |             |       |      |             |       |
| Loss of employment due to disaster         | Yes  | 1.01 | (0.98–1.04) | 0.64  | 0.96 | (0.89–1.03) | 0.24  |
|                                            | No   | 1.00 |             |       | 1.00 |             |       |
| <b>Perception of radiation risks</b>       |      |      |             |       |      |             |       |
| Delayed effects                            | High | 1.04 | (1.01–1.07) | <0.01 | 1.07 | (0.99–1.14) | 0.06  |
|                                            | Low  | 1.00 |             |       | 1.00 |             |       |
| <b>Drinking behavior in 2012</b>           |      |      |             |       |      |             |       |
| Heavy drinkers (4 drinks/day and more)     |      | –    | –           | –     | 1.30 | (1.17–1.50) | <0.01 |
| Light drinkers (less than 4 drinks/day)    |      | –    |             |       | 1.00 |             |       |

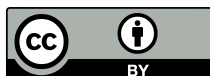

© 2017 by the authors. Submitted for possible open access publication under the terms and conditions of the Creative Commons Attribution (CC BY) license (<http://creativecommons.org/licenses/by/4.0/>).
